# Supplementary material for: The dynamics of indigenous epiphytic bacterial and fungal communities of barley grains through the commercial malting process in Western Canada
Source: PubMed Central journal article supplement — Curr Res Food Sci. 2022 Aug 25;5:1352–64. doi: 10.1016/j.crfs.2022.08.009 (PMC9445228; doi:10.1016/j.crfs.2022.08.009), 2022-08-25
Supplement: mmc1.pdf [file mmc1.pdf]

**The dynamics of indigenous epiphytic bacterial and fungal communities of barley grains  
through the commercial malting process in Western Canada**

1 **Wen Chen** <sup>1,5\*</sup>, **H.Y. Kitty Cheung** <sup>1,2</sup>, **Morgan McMillan** <sup>1</sup>, **Thomas Kelly Turkington** <sup>3</sup>, **Marta**  
2 **S. Izydorczyk** <sup>4</sup>, **Tom Gräfenhan** <sup>4\*§</sup>

3 <sup>1</sup> Ottawa Research and Development Centre, Agriculture and Agri-Food Canada, Ottawa, ON,  
4 Canada

5 <sup>2</sup> Saskatoon Research and Development Centre, Agriculture and Agri-Food Canada, Saskatoon, SK,  
6 Canada

7 <sup>3</sup> Lacombe Research and Development Centre, Agriculture and Agri-Food Canada, Lacombe, AB,  
8 Canada

9 <sup>4</sup> Grain Research Laboratory, Canadian Grain Commission, Winnipeg, MB, Canada (present address:  
10 Core Unit Systems Medicine, University of Würzburg, Würzburg, Germany)

11 <sup>5</sup> Department of Biology, University of Ottawa, Ottawa, ON, Canada

12 § present address: Core Unit Systems Medicine, University of Würzburg, Würzburg, Germany  
13

14

15 **\* Correspondence:**

16 Wen Chen, wen.chen@agr.gc.ca

17 Tom Gräfenhan, tom.graefenhan@gmail.com

## ***Supplementary Material***

### **1 Supplementary Figures and Tables**

#### **1.1 Supplementary Tables**

**Supplementary Table S1. Synonyms of fungal genera.**

**Supplementary Table S2. Sequences and OTUs assigned to a known taxon at each taxonomic rank.**

**Supplementary Table S3. Metabolic pathways enriched or depleted through the malting process.**

**Supplementary Table S4: Topological properties of molecular ecological networks of microbial communities associated with field and steeped barley grains and the malt end product.**

#### **1.2 Supplementary Figures**

**Supplementary Figure S1. Fungal community taxonomic profile at the A) phylum, B) class, C) order, D) family, and E) genus levels.**

**Supplementary Figure S2. Bacterial community taxonomic profile at the A) phylum, B) class, C) order, D) family, and E) genus levels.**

**Supplementary Table S1. Fungal synonyms list.**

| <b>Accepted generic name</b> | <b>Synonyms being substituted</b> |
|------------------------------|-----------------------------------|
| Alternaria                   | Lewia                             |
| Ascocoryne                   | Coryne                            |
| Aspergillus                  | Eurotium, Emericella              |
| Asterophora                  | Ugola                             |
| Bipolaris                    | Cochliobolus                      |
| Ceratobasidium               | Ceratorhiza                       |
| Cladosporium                 | Davidiella                        |
| Claviceps                    | Sphacelia                         |
| Coprinellus                  | Ozonium                           |
| Coprinopsis                  | Hormographiella                   |
| Cristulariella               | Nervostroma                       |
| Dendrocollybia               | Tilachlidiopsis                   |
| Drechslera                   | Pyrenophora, Setosphaeria         |
| Epichloe                     | Neotyphodium                      |
| Exobasidium                  | Tilletiopsis                      |
| Exserohilum                  | Setosphaeria                      |
| Fusarium                     | Gibberella                        |
| Ganoderma                    | Thermophymatospora                |
| Grovesinia                   | Hinomyces                         |
| Hohenbuehelia                | Nematoctonus                      |
| Microdochium                 | Monographella                     |
| Morchella                    | Costantinella                     |
| Nectria                      | Tubercularia                      |
| Onygena                      | Sporendonema                      |
| Penicillium                  | Eupenicillium                     |
| Pleurotus                    | Antromycopsis                     |
| Ramularia                    | Mycosphaerella                    |
| Termitomyces                 | Termitosphaera                    |
| Tolypocladium                | Elaphocordyceps                   |
| Trichoderma                  | Hypocrea                          |
| Tulasnella                   | Epulothiza                        |
| Ustilago                     | Pseudozyma                        |
| Valdensia                    | Valdensinia                       |
| Wolfiporia                   | Gemmularia                        |

**Supplementary Table S2. Sequences and OTUs assigned to a known taxon at each taxonomic rank**

|                | ITS2        |            |                        |                   | 16S         |            |                        |                   |
|----------------|-------------|------------|------------------------|-------------------|-------------|------------|------------------------|-------------------|
|                | Total Reads | Total OTUs | % sequences identified | % OTUs identified | Total Reads | Total OTUs | % sequences identified | % OTUs identified |
| <b>Kingdom</b> | 587127      | 962        | 100.0                  | 100.0             | 1399108.0   | 2566.0     | 100.0                  | 100.0             |
| <b>Phylum</b>  |             |            | 100.0                  | 100.0             |             |            | 100.0                  | 100.0             |
| <b>Class</b>   |             |            | 98.8                   | 97.7              |             |            | 100.0                  | 100.0             |
| <b>Order</b>   |             |            | 98.7                   | 96.1              |             |            | 100.0                  | 99.0              |
| <b>Family</b>  |             |            | 46.0                   | 44.8              |             |            | 99.3                   | 92.9              |
| <b>Genus</b>   |             |            | 93.6                   | 68.9              |             |            | 57.2                   | 64.3              |

### Supplementary Table S3. Metabolic pathways enriched or depleted through the malting process

| Function     | description                                               | genus                                                                                                                                                                                                   | Reference stage | Stage  | Enriched/ Depleted | baseMean | log2Fold Change | lfcSE | padj     |
|--------------|-----------------------------------------------------------|---------------------------------------------------------------------------------------------------------------------------------------------------------------------------------------------------------|-----------------|--------|--------------------|----------|-----------------|-------|----------|
| THREOCAT-PWY | superpathway of L-threonine metabolism                    | Corynebacterium;<br>Lactococcus;<br>Arthrobacter;<br>Micrococcaceae;<br>Leuconostoc;<br>Microbacterium;<br>Sphingobacterium;<br>Actinomycetales;<br>Streptococcus;<br>Leuconostocaceae;<br>Sanguibacter | Field_Barley    | Kilned | Enriched           | 169.96   | 9.79            | 1.10  | 1.34E-17 |
| PWY-7013     | L-1,2-propanediol degradation                             | Corynebacterium;<br>Lactococcus;<br>Arthrobacter;<br>Micrococcaceae;<br>Leuconostoc;<br>Microbacterium;<br>Actinomycetales;<br>Sphingobacterium;<br>Streptococcus;<br>Leuconostocaceae;<br>Sanguibacter | Field_Barley    | Kilned | Enriched           | 301.49   | 7.97            | 0.90  | 2.72E-17 |
| PWY-5005     | biotin biosynthesis II                                    | Corynebacterium;<br>Arthrobacter;<br>Micrococcaceae;<br>Leuconostoc;<br>Sphingobacterium;<br>Actinomycetales;<br>Streptococcus                                                                          | Field_Barley    | Kilned | Enriched           | 101.77   | 7.96            | 0.85  | 2.74E-19 |
| P164-PWY     | purine nucleobases degradation I (anaerobic)              | Corynebacterium;<br>Lactococcus;<br>Arthrobacter;<br>Micrococcaceae;<br>Leuconostoc;<br>Microbacterium;<br>Sphingobacterium;<br>Actinomycetales;<br>Streptococcus;<br>Leuconostocaceae;<br>Sanguibacter | Field_Barley    | Kilned | Enriched           | 286.44   | 7.84            | 0.88  | 1.55E-17 |
| PWY-5507     | adenosylcobalamin biosynthesis I (early cobalt insertion) | Corynebacterium;<br>Lactococcus;<br>Arthrobacter;<br>Micrococcaceae;<br>Leuconostoc;<br>Microbacterium;<br>Sphingobacterium;<br>Actinomycetales;<br>Streptococcus;<br>Leuconostocaceae;<br>Sanguibacter | Field_Barley    | Kilned | Enriched           | 125.52   | 7.17            | 0.89  | 1.16E-14 |

| Function          | description                                                                                  | genus                                                                                                                                                                                                   | Reference stage | Stage  | Enriched/ Depleted | baseMean | log2Fold Change | lfcSE | padj     |
|-------------------|----------------------------------------------------------------------------------------------|---------------------------------------------------------------------------------------------------------------------------------------------------------------------------------------------------------|-----------------|--------|--------------------|----------|-----------------|-------|----------|
| LACTOSECAT-PWY    | lactose and galactose degradation I                                                          | Arthrobacter;<br>Micrococcaceae;<br>Lactococcus;<br>Streptococcus;<br>Leuconostoc;<br>Microbacterium;<br>Actinomycetales                                                                                | Field_Barley    | Kilned | Enriched           | 223.06   | 6.95            | 0.81  | 2.18E-16 |
| PWY-6470          | peptidoglycan biosynthesis V (&beta;-lactam resistance)                                      | Corynebacterium;<br>Lactococcus;<br>Arthrobacter;<br>Micrococcaceae;<br>Leuconostoc;<br>Microbacterium;<br>Sphingobacterium;<br>Actinomycetales;<br>Streptococcus;<br>Leuconostocaceae;<br>Sanguibacter | Field_Barley    | Kilned | Enriched           | 1126.54  | 6.71            | 0.54  | 2.86E-33 |
| HCAMHPDEG-PWY     | 3-phenylpropanoate and 3-(3-hydroxyphenyl)propanoate degradation to 2-oxopent-4-enoate       | Micrococcaceae;<br>Microbacterium;<br>Arthrobacter;<br>Corynebacterium;<br>Actinomycetales                                                                                                              | Field_Barley    | Kilned | Enriched           | 224.87   | 4.65            | 0.53  | 5.60E-17 |
| PWY-6690          | cinnamate and 3-hydroxycinnamate degradation to 2-oxopent-4-enoate                           | Micrococcaceae;<br>Microbacterium;<br>Arthrobacter;<br>Corynebacterium;<br>Actinomycetales                                                                                                              | Field_Barley    | Kilned | Enriched           | 224.87   | 4.65            | 0.53  | 5.60E-17 |
| PWY-6339          | syringate degradation                                                                        | Corynebacterium;<br>Lactococcus;<br>Arthrobacter;<br>Micrococcaceae;<br>Actinomycetales;<br>Leuconostoc;<br>Leuconostocaceae;<br>Streptococcus;<br>Sanguibacter;<br>Microbacterium                      | Field_Barley    | Kilned | Enriched           | 222.02   | 4.16            | 0.77  | 3.20E-07 |
| GLCMANNANAU-T-PWY | superpathway of N-acetylglucosamine, N-acetylmannosamine and N-acetylneuraminate degradation | Corynebacterium;<br>Lactococcus;<br>Arthrobacter;<br>Micrococcaceae;<br>Leuconostoc;<br>Microbacterium;<br>Sphingobacterium;<br>Actinomycetales;<br>Streptococcus;<br>Leuconostocaceae;<br>Sanguibacter | Field_Barley    | Kilned | Enriched           | 358.83   | 4.04            | 0.53  | 2.42E-13 |

| Function                      | description                                                      | genus                                                                                                                                                                                                   | Reference stage | Stage  | Enriched/ Depleted | baseMean | log2Fold Change | lfcSE | padj     |
|-------------------------------|------------------------------------------------------------------|---------------------------------------------------------------------------------------------------------------------------------------------------------------------------------------------------------|-----------------|--------|--------------------|----------|-----------------|-------|----------|
| PWY0-1277                     | 3-phenylpropanoate and 3-(3-hydroxyphenyl)propanoate degradation | Lactococcus;<br>Micrococcaceae;<br>Leuconostoc;<br>Microbacterium;<br>Arthrobacter;<br>Actinomycetales;<br>Streptococcus;<br>Leuconostocaceae;<br>Sanguibacter;<br>Corynebacterium                      | Field_Barley    | Kilned | Enriched           | 490.33   | 3.78            | 0.45  | 6.52E-16 |
| P441-PWY                      | superpathway of N-acetylneuraminate degradation                  | Corynebacterium;<br>Lactococcus;<br>Arthrobacter;<br>Micrococcaceae;<br>Leuconostoc;<br>Microbacterium;<br>Sphingobacterium;<br>Actinomycetales;<br>Streptococcus;<br>Leuconostocaceae;<br>Sanguibacter | Field_Barley    | Kilned | Enriched           | 879.26   | 3.59            | 0.47  | 2.65E-13 |
| GALLATE-DEGRADATION-I-PWY     | gallate degradation II                                           | Arthrobacter;<br>Micrococcaceae;<br>Microbacterium                                                                                                                                                      | Field_Barley    | Kilned | Enriched           | 143.56   | 3.23            | 0.59  | 2.06E-07 |
| METHYLGALLATE-DEGRADATION-PWY | methylgallate degradation                                        | Corynebacterium;<br>Lactococcus;<br>Arthrobacter;<br>Micrococcaceae;<br>Actinomycetales;<br>Leuconostoc;<br>Leuconostocaceae;<br>Streptococcus;<br>Sanguibacter;<br>Microbacterium                      | Field_Barley    | Kilned | Enriched           | 177.52   | 3.21            | 0.58  | 1.85E-07 |
| PWY-5860                      | superpathway of demethylmenaquinone I-6 biosynthesis I           | Corynebacterium;<br>Lactococcus;<br>Arthrobacter;<br>Micrococcaceae;<br>Leuconostoc;<br>Microbacterium;<br>Sphingobacterium;<br>Actinomycetales;<br>Leuconostocaceae;<br>Sanguibacter;<br>Streptococcus | Field_Barley    | Kilned | Enriched           | 525.42   | 3.12            | 0.24  | 9.43E-36 |
| PWY-5862                      | superpathway of demethylmenaquinone I-9 biosynthesis             | Corynebacterium;<br>Lactococcus;<br>Arthrobacter;<br>Micrococcaceae;<br>Leuconostoc;<br>Microbacterium;<br>Sphingobacterium;<br>Actinomycetales;<br>Leuconostocaceae;<br>Sanguibacter;<br>Streptococcus | Field_Barley    | Kilned | Enriched           | 525.42   | 3.12            | 0.24  | 9.43E-36 |

| Function | description                                                   | genus                                                                                                                                                                                                   | Reference stage | Stage  | Enriched/ Depleted | baseMean | log2Fold Change | lfcSE | padj     |
|----------|---------------------------------------------------------------|---------------------------------------------------------------------------------------------------------------------------------------------------------------------------------------------------------|-----------------|--------|--------------------|----------|-----------------|-------|----------|
| P381-PWY | adenosylcobalamin biosynthesis II (late cobalt incorporation) | Corynebacterium;<br>Lactococcus;<br>Arthrobacter;<br>Micrococcaceae;<br>Leuconostoc;<br>Microbacterium;<br>Sphingobacterium;<br>Actinomycetales;<br>Streptococcus;<br>Leuconostocaceae;<br>Sanguibacter | Field_Barley    | Kilned | Enriched           | 167.81   | 3.02            | 0.53  | 5.75E-08 |
| PWY-5845 | superpathway of menaquinol-9 biosynthesis                     | Corynebacterium;<br>Lactococcus;<br>Arthrobacter;<br>Micrococcaceae;<br>Leuconostoc;<br>Microbacterium;<br>Sphingobacterium;<br>Actinomycetales;<br>Leuconostocaceae;<br>Sanguibacter;<br>Streptococcus | Field_Barley    | Kilned | Enriched           | 734.42   | 3.02            | 0.23  | 8.59E-37 |
| PWY-5850 | superpathway of menaquinol-6 biosynthesis I                   | Corynebacterium;<br>Lactococcus;<br>Arthrobacter;<br>Micrococcaceae;<br>Leuconostoc;<br>Microbacterium;<br>Sphingobacterium;<br>Actinomycetales;<br>Leuconostocaceae;<br>Sanguibacter;<br>Streptococcus | Field_Barley    | Kilned | Enriched           | 734.42   | 3.02            | 0.23  | 8.59E-37 |
| PWY-5896 | superpathway of menaquinol-10 biosynthesis                    | Corynebacterium;<br>Lactococcus;<br>Arthrobacter;<br>Micrococcaceae;<br>Leuconostoc;<br>Microbacterium;<br>Sphingobacterium;<br>Actinomycetales;<br>Leuconostocaceae;<br>Sanguibacter;<br>Streptococcus | Field_Barley    | Kilned | Enriched           | 734.42   | 3.02            | 0.23  | 8.59E-37 |
| P341-PWY | glycolysis V (Pyrococcus)                                     | Corynebacterium;<br>Lactococcus;<br>Arthrobacter;<br>Micrococcaceae;<br>Leuconostoc;<br>Microbacterium;<br>Sphingobacterium;<br>Actinomycetales;<br>Streptococcus;<br>Leuconostocaceae;<br>Sanguibacter | Field_Barley    | Kilned | Enriched           | 138.75   | 2.96            | 0.43  | 3.17E-11 |



| Function                | description                                                                             | genus                                                                                                                                                                                                   | Reference stage | Stage  | Enriched/ Depleted | baseMean | log2Fold Change | lfcSE | padj     |
|-------------------------|-----------------------------------------------------------------------------------------|---------------------------------------------------------------------------------------------------------------------------------------------------------------------------------------------------------|-----------------|--------|--------------------|----------|-----------------|-------|----------|
| HEXITOLDEGSU<br>PER-PWY | superpathway of<br>hexitol degradation<br>(bacteria)                                    | Corynebacterium;<br>Lactococcus;<br>Arthrobacter;<br>Micrococcaceae;<br>Leuconostoc;<br>Microbacterium;<br>Sphingobacterium;<br>Actinomycetales;<br>Streptococcus;<br>Leuconostocaceae;<br>Sanguibacter | Field_Barley    | Kilned | Enriched           | 2064.62  | 2.27            | 0.26  | 4.95E-17 |
| TEICHOICACID-<br>PWY    | teichoic acid (poly-<br>glycerol)<br>biosynthesis                                       | Corynebacterium;<br>Lactococcus;<br>Arthrobacter;<br>Micrococcaceae;<br>Leuconostoc;<br>Microbacterium;<br>Sphingobacterium;<br>Actinomycetales;<br>Streptococcus;<br>Leuconostocaceae;<br>Sanguibacter | Field_Barley    | Kilned | Enriched           | 1808.39  | 2.03            | 0.22  | 2.68E-18 |
| PWY-1269                | CMP-3-deoxy-D-<br>manno-oculosonate<br>biosynthesis I                                   | Pedobacter;<br>Xanthomonas;<br>Xanthomonadaceae;<br>Luteimonas                                                                                                                                          | Field_Barley    | Kilned | Depleted           | 551.14   | -2.10           | 0.30  | 1.81E-11 |
| PWY-5855                | ubiquinol-7<br>biosynthesis<br>(prokaryotic)                                            | Intrasporangiaceae;<br>Pedobacter;<br>Xanthomonas;<br>Xanthomonadaceae;<br>Luteimonas                                                                                                                   | Field_Barley    | Kilned | Depleted           | 1114.29  | -2.16           | 0.44  | 2.32E-06 |
| PWY-5856                | ubiquinol-9<br>biosynthesis<br>(prokaryotic)                                            | Intrasporangiaceae;<br>Pedobacter;<br>Xanthomonas;<br>Xanthomonadaceae;<br>Luteimonas                                                                                                                   | Field_Barley    | Kilned | Depleted           | 1114.29  | -2.16           | 0.44  | 2.32E-06 |
| PWY-5857                | ubiquinol-10<br>biosynthesis<br>(prokaryotic)                                           | Intrasporangiaceae;<br>Pedobacter;<br>Xanthomonas;<br>Xanthomonadaceae;<br>Luteimonas                                                                                                                   | Field_Barley    | Kilned | Depleted           | 1114.29  | -2.16           | 0.44  | 2.32E-06 |
| PWY-6708                | ubiquinol-8<br>biosynthesis<br>(prokaryotic)                                            | Intrasporangiaceae;<br>Pedobacter;<br>Xanthomonas;<br>Xanthomonadaceae;<br>Luteimonas                                                                                                                   | Field_Barley    | Kilned | Depleted           | 1114.29  | -2.16           | 0.44  | 2.32E-06 |
| PWY-5920                | superpathway of<br>heme biosynthesis<br>from glycine                                    | Intrasporangiaceae;<br>Pedobacter;<br>Xanthomonas;<br>Xanthomonadaceae;<br>Luteimonas                                                                                                                   | Field_Barley    | Kilned | Depleted           | 1274.38  | -2.27           | 0.33  | 5.95E-11 |
| PWY-7328                | superpathway of<br>UDP-glucose-<br>derived O-antigen<br>building blocks<br>biosynthesis | Intrasporangiaceae;<br>Pedobacter;<br>Xanthomonas;<br>Xanthomonadaceae;<br>Luteimonas                                                                                                                   | Field_Barley    | Kilned | Depleted           | 987.48   | -2.28           | 0.26  | 6.44E-17 |

| Function            | description                                            | genus                                                                                 | Reference stage | Stage  | Enriched/ Depleted | baseMean | log2Fold Change | lfcSE | padj       |
|---------------------|--------------------------------------------------------|---------------------------------------------------------------------------------------|-----------------|--------|--------------------|----------|-----------------|-------|------------|
| NAGLIPASYN-PWY      | lipid IVA biosynthesis                                 | Pedobacter;<br>Xanthomonas;<br>Xanthomonadaceae;<br>Luteimonas                        | Field_Barley    | Kilned | Depleted           | 536.80   | -2.32           | 0.32  | 2.99E-12   |
| PWY0-862            | (5Z)-dodec-5-enoate biosynthesis                       | Intrasporangiaceae;<br>Pedobacter;<br>Xanthomonas;<br>Xanthomonadaceae;<br>Luteimonas | Field_Barley    | Kilned | Depleted           | 1419.47  | -2.33           | 0.31  | 1.21E-12   |
| PWY0-321            | phenylacetate degradation I (aerobic)                  | Intrasporangiaceae;<br>Pedobacter;<br>Xanthomonas;<br>Xanthomonadaceae;<br>Luteimonas | Field_Barley    | Kilned | Depleted           | 322.41   | -2.36           | 0.74  | 0.00303849 |
| PWY-5655            | L-tryptophan degradation IX                            | Intrasporangiaceae;<br>Pedobacter;<br>Xanthomonas;<br>Xanthomonadaceae;<br>Luteimonas | Field_Barley    | Kilned | Depleted           | 117.54   | -2.40           | 0.39  | 3.18E-09   |
| UBISYN-PWY          | superpathway of ubiquinol-8 biosynthesis (prokaryotic) | Intrasporangiaceae;<br>Pedobacter;<br>Xanthomonas;<br>Xanthomonadaceae;<br>Luteimonas | Field_Barley    | Kilned | Depleted           | 870.54   | -2.43           | 0.41  | 1.83E-08   |
| PWY-7664            | oleate biosynthesis IV (anaerobic)                     | Intrasporangiaceae;<br>Pedobacter;<br>Xanthomonas;<br>Xanthomonadaceae;<br>Luteimonas | Field_Barley    | Kilned | Depleted           | 1494.96  | -2.45           | 0.33  | 7.61E-13   |
| GLUCOSE1PMET AB-PWY | glucose and glucose-1-phosphate degradation            | Intrasporangiaceae;<br>Pedobacter;<br>Xanthomonas;<br>Xanthomonadaceae;<br>Luteimonas | Field_Barley    | Kilned | Depleted           | 900.17   | -2.48           | 0.30  | 1.51E-15   |
| PWYG-321            | mycolate biosynthesis                                  | Intrasporangiaceae;<br>Pedobacter;<br>Xanthomonas;<br>Xanthomonadaceae;<br>Luteimonas | Field_Barley    | Kilned | Depleted           | 1576.31  | -2.50           | 0.34  | 1.20E-12   |
| PWY-6467            | Kdo transfer to lipid IVA III (Chlamydia)              | Pedobacter;<br>Xanthomonas;<br>Xanthomonadaceae;<br>Luteimonas                        | Field_Barley    | Kilned | Depleted           | 504.88   | -2.52           | 0.35  | 2.88E-12   |
| LEU-DEG2-PWY        | L-leucine degradation I                                | Intrasporangiaceae;<br>Pedobacter;<br>Xanthomonas;<br>Xanthomonadaceae;<br>Luteimonas | Field_Barley    | Kilned | Depleted           | 738.50   | -2.59           | 0.35  | 7.47E-13   |
| PWY-6282            | palmitoleate biosynthesis I (from (5Z)-dodec-5-enoate) | Intrasporangiaceae;<br>Pedobacter;<br>Xanthomonas;<br>Xanthomonadaceae;<br>Luteimonas | Field_Barley    | Kilned | Depleted           | 1421.18  | -2.60           | 0.35  | 8.94E-13   |
| PWY-5989            | stearate biosynthesis II (bacteria and plants)         | Intrasporangiaceae;<br>Pedobacter;<br>Xanthomonas;<br>Xanthomonadaceae;<br>Luteimonas | Field_Barley    | Kilned | Depleted           | 1502.88  | -2.64           | 0.35  | 7.27E-13   |

| Function                | description                                                  | genus                                                                                 | Reference stage | Stage  | Enriched/ Depleted | baseMean | log2Fold Change | lfcSE | padj        |
|-------------------------|--------------------------------------------------------------|---------------------------------------------------------------------------------------|-----------------|--------|--------------------|----------|-----------------|-------|-------------|
| PWY-6731                | starch degradation III                                       | Intrasporangiaceae;<br>Pedobacter;<br>Xanthomonas;<br>Xanthomonadaceae;<br>Luteimonas | Field_Barley    | Kilned | Depleted           | 360.48   | -2.68           | 0.38  | 1.38E-11    |
| PWY-5181                | toluene degradation III (aerobic) (via p-cresol)             | Intrasporangiaceae;<br>Xanthomonas;<br>Xanthomonadaceae;<br>Luteimonas;<br>Pedobacter | Field_Barley    | Kilned | Depleted           | 399.47   | -2.74           | 0.76  | 0.000774206 |
| PWY-6182                | superpathway of salicylate degradation                       | Intrasporangiaceae;<br>Xanthomonas;<br>Xanthomonadaceae;<br>Luteimonas                | Field_Barley    | Kilned | Depleted           | 307.90   | -2.74           | 0.62  | 2.68E-05    |
| BIOTIN-BIOSYNTHESIS-PWY | biotin biosynthesis I                                        | Intrasporangiaceae;<br>Pedobacter;<br>Xanthomonas;<br>Xanthomonadaceae;<br>Luteimonas | Field_Barley    | Kilned | Depleted           | 964.31   | -2.77           | 0.46  | 7.75E-09    |
| PWY-7315                | dTDP-N-acetylthomosamine biosynthesis                        | Intrasporangiaceae;<br>Pedobacter;<br>Xanthomonas;<br>Xanthomonadaceae;<br>Luteimonas | Field_Barley    | Kilned | Depleted           | 121.36   | -2.82           | 0.40  | 1.95E-11    |
| FASYN-INITIAL-PWY       | superpathway of fatty acid biosynthesis initiation (E. coli) | Intrasporangiaceae;<br>Pedobacter;<br>Xanthomonas;<br>Xanthomonadaceae;<br>Luteimonas | Field_Barley    | Kilned | Depleted           | 1549.95  | -2.87           | 0.37  | 1.69E-13    |
| PWY-5417                | catechol degradation III (ortho-cleavage pathway)            | Intrasporangiaceae;<br>Xanthomonas;<br>Xanthomonadaceae;<br>Luteimonas                | Field_Barley    | Kilned | Depleted           | 314.23   | -2.88           | 0.63  | 1.81E-05    |
| PWY-5431                | aromatic compounds degradation via $\beta$ -keto adipate     | Intrasporangiaceae;<br>Xanthomonas;<br>Xanthomonadaceae;<br>Luteimonas                | Field_Barley    | Kilned | Depleted           | 314.23   | -2.88           | 0.63  | 1.81E-05    |
| PWY-6630                | superpathway of L-tyrosine biosynthesis                      | Intrasporangiaceae;<br>Pedobacter;<br>Xanthomonas;<br>Xanthomonadaceae;<br>Luteimonas | Field_Barley    | Kilned | Depleted           | 1168.54  | -3.07           | 0.84  | 0.000665029 |
| PWY-6185                | 4-methylcatechol degradation (ortho cleavage)                | Intrasporangiaceae;<br>Xanthomonas;<br>Xanthomonadaceae;<br>Luteimonas                | Field_Barley    | Kilned | Depleted           | 298.98   | -3.07           | 0.80  | 0.000343752 |
| PWY-6628                | superpathway of L-phenylalanine biosynthesis                 | Intrasporangiaceae;<br>Pedobacter;<br>Xanthomonas;<br>Xanthomonadaceae;<br>Luteimonas | Field_Barley    | Kilned | Depleted           | 1181.62  | -3.08           | 0.84  | 0.000641244 |
| PWY-6519                | 8-amino-7-oxononanoate biosynthesis I                        | Intrasporangiaceae;<br>Pedobacter;<br>Xanthomonas;<br>Xanthomonadaceae;<br>Luteimonas | Field_Barley    | Kilned | Depleted           | 1044.36  | -3.16           | 0.49  | 5.91E-10    |

| Function            | description                                                           | genus                                                                                                                                                                                                   | Reference stage | Stage   | Enriched/ Depleted | baseMean | log2Fold Change | lfcSE | padj        |
|---------------------|-----------------------------------------------------------------------|---------------------------------------------------------------------------------------------------------------------------------------------------------------------------------------------------------|-----------------|---------|--------------------|----------|-----------------|-------|-------------|
| PWY-5654            | 2-amino-3-carboxymuconate semialdehyde degradation to 2-oxopentenoate | Intrasporangiaceae;<br>Xanthomonadaceae;<br>Luteimonas                                                                                                                                                  | Field_Barley    | Kilned  | Depleted           | 214.29   | -3.19           | 0.44  | 2.81E-12    |
| PWY-5647            | 2-nitrobenzoate degradation I                                         | Intrasporangiaceae;<br>Xanthomonas;<br>Xanthomonadaceae;<br>Luteimonas                                                                                                                                  | Field_Barley    | Kilned  | Depleted           | 231.32   | -3.33           | 0.44  | 2.78E-13    |
| NAD-BIOSYNTHESIS-II | NAD salvage pathway II                                                | Intrasporangiaceae;<br>Pedobacter;<br>Xanthomonas;<br>Xanthomonadaceae;<br>Luteimonas                                                                                                                   | Field_Barley    | Kilned  | Depleted           | 397.99   | -3.45           | 0.91  | 0.000440583 |
| NADSYN-PWY          | NAD biosynthesis II (from tryptophan)                                 | Intrasporangiaceae;<br>Pedobacter;<br>Xanthomonas;<br>Xanthomonadaceae;<br>Luteimonas                                                                                                                   | Field_Barley    | Kilned  | Depleted           | 587.75   | -3.61           | 0.59  | 4.39E-09    |
| PWY-5651            | L-tryptophan degradation to 2-amino-3-carboxymuconate semialdehyde    | Intrasporangiaceae;<br>Pedobacter;<br>Xanthomonas;<br>Xanthomonadaceae;<br>Luteimonas                                                                                                                   | Field_Barley    | Kilned  | Depleted           | 456.17   | -3.84           | 0.61  | 2.35E-09    |
| TYRFUMCAT-PWY       | L-tyrosine degradation I                                              | Intrasporangiaceae;<br>Pedobacter;<br>Xanthomonas;<br>Xanthomonadaceae;<br>Luteimonas                                                                                                                   | Field_Barley    | Kilned  | Depleted           | 452.27   | -3.86           | 0.74  | 7.53E-07    |
| PPGPPMET-PWY        | ppGpp biosynthesis                                                    | Intrasporangiaceae;<br>Pedobacter;<br>Xanthomonas;<br>Xanthomonadaceae;<br>Luteimonas                                                                                                                   | Field_Barley    | Kilned  | Depleted           | 706.97   | -4.07           | 0.80  | 1.26E-06    |
| PWY0-1479           | tRNA processing                                                       | Intrasporangiaceae;<br>Pedobacter;<br>Xanthomonas;<br>Xanthomonadaceae;<br>Luteimonas                                                                                                                   | Field_Barley    | Kilned  | Depleted           | 122.95   | -4.43           | 0.83  | 4.95E-07    |
| PWY-5028            | L-histidine degradation II                                            | Intrasporangiaceae;<br>Pedobacter;<br>Xanthomonas;<br>Xanthomonadaceae;<br>Luteimonas                                                                                                                   | Field_Barley    | Kilned  | Depleted           | 330.26   | -4.67           | 0.56  | 1.99E-15    |
| THREOCAT-PWY        | superpathway of L-threonine metabolism                                | Corynebacterium;<br>Lactococcus;<br>Arthrobacter;<br>Micrococcaceae;<br>Leuconostoc;<br>Microbacterium;<br>Sphingobacterium;<br>Actinomycetales;<br>Streptococcus;<br>Leuconostocaceae;<br>Sanguibacter | Field_Barley    | Steeped | Enriched           | 169.96   | 8.60            | 1.19  | 7.96E-11    |

| Function       | description                                               | genus                                                                                                                                                                                                   | Reference stage | Stage   | Enriched/ Depleted | baseMean | log2Fold Change | lfcSE | padj     |
|----------------|-----------------------------------------------------------|---------------------------------------------------------------------------------------------------------------------------------------------------------------------------------------------------------|-----------------|---------|--------------------|----------|-----------------|-------|----------|
| PWY-7013       | L-1,2-propanediol degradation                             | Corynebacterium;<br>Lactococcus;<br>Arthrobacter;<br>Micrococcaceae;<br>Leuconostoc;<br>Microbacterium;<br>Actinomycetales;<br>Sphingobacterium;<br>Streptococcus;<br>Leuconostocaceae;<br>Sanguibacter | Field_Barley    | Steeped | Enriched           | 301.49   | 7.00            | 1.01  | 4.06E-10 |
| PI64-PWY       | purine nucleobases degradation I (anaerobic)              | Corynebacterium;<br>Lactococcus;<br>Arthrobacter;<br>Micrococcaceae;<br>Leuconostoc;<br>Microbacterium;<br>Sphingobacterium;<br>Actinomycetales;<br>Streptococcus;<br>Leuconostocaceae;<br>Sanguibacter | Field_Barley    | Steeped | Enriched           | 286.44   | 6.45            | 0.99  | 4.08E-09 |
| PWY-5005       | biotin biosynthesis II                                    | Corynebacterium;<br>Arthrobacter;<br>Micrococcaceae;<br>Leuconostoc;<br>Sphingobacterium;<br>Actinomycetales;<br>Streptococcus                                                                          | Field_Barley    | Steeped | Enriched           | 101.77   | 6.00            | 0.92  | 4.08E-09 |
| PWY-5507       | adenosylcobalamin biosynthesis I (early cobalt insertion) | Corynebacterium;<br>Lactococcus;<br>Arthrobacter;<br>Micrococcaceae;<br>Leuconostoc;<br>Microbacterium;<br>Sphingobacterium;<br>Actinomycetales;<br>Streptococcus;<br>Leuconostocaceae;<br>Sanguibacter | Field_Barley    | Steeped | Enriched           | 125.52   | 5.84            | 0.99  | 1.66E-07 |
| LACTOSECAT-PWY | lactose and galactose degradation I                       | Arthrobacter;<br>Micrococcaceae;<br>Lactococcus;<br>Streptococcus;<br>Leuconostoc;<br>Microbacterium;<br>Actinomycetales                                                                                | Field_Barley    | Steeped | Enriched           | 223.06   | 5.83            | 0.91  | 8.33E-09 |
| PWY-6470       | peptidoglycan biosynthesis V (&beta;-lactam resistance)   | Corynebacterium;<br>Lactococcus;<br>Arthrobacter;<br>Micrococcaceae;<br>Leuconostoc;<br>Microbacterium;<br>Sphingobacterium;<br>Actinomycetales;<br>Streptococcus;<br>Leuconostocaceae;<br>Sanguibacter | Field_Barley    | Steeped | Enriched           | 1126.54  | 4.79            | 0.62  | 1.97E-12 |

| Function                      | description                                                                                  | genus                                                                                                                                                                                                   | Reference stage | Stage   | Enriched/ Depleted | baseMean | log2Fold Change | lfcSE | padj        |
|-------------------------------|----------------------------------------------------------------------------------------------|---------------------------------------------------------------------------------------------------------------------------------------------------------------------------------------------------------|-----------------|---------|--------------------|----------|-----------------|-------|-------------|
| PWY-6339                      | syringate degradation                                                                        | Corynebacterium;<br>Lactococcus;<br>Arthrobacter;<br>Micrococcaceae;<br>Actinomycetales;<br>Leuconostoc;<br>Leuconostocaceae;<br>Streptococcus;<br>Sanguibacter;<br>Microbacterium                      | Field_Barley    | Steeped | Enriched           | 222.02   | 3.26            | 0.87  | 0.002579709 |
| GLCMANNANAU T-PWY             | superpathway of N-acetylglucosamine, N-acetylmannosamine and N-acetylneuraminate degradation | Corynebacterium;<br>Lactococcus;<br>Arthrobacter;<br>Micrococcaceae;<br>Leuconostoc;<br>Microbacterium;<br>Sphingobacterium;<br>Actinomycetales;<br>Streptococcus;<br>Leuconostocaceae;<br>Sanguibacter | Field_Barley    | Steeped | Enriched           | 358.83   | 2.30            | 0.60  | 0.001824711 |
| GALLATE-DEGRADATION-I-PWY     | gallate degradation II                                                                       | Arthrobacter;<br>Micrococcaceae;<br>Microbacterium                                                                                                                                                      | Field_Barley    | Steeped | Enriched           | 143.56   | 2.29            | 0.67  | 0.004950516 |
| METHYLGALLATE-DEGRADATION-PWY | methylgallate degradation                                                                    | Corynebacterium;<br>Lactococcus;<br>Arthrobacter;<br>Micrococcaceae;<br>Actinomycetales;<br>Leuconostoc;<br>Leuconostocaceae;<br>Streptococcus;<br>Sanguibacter;<br>Microbacterium                      | Field_Barley    | Steeped | Enriched           | 177.52   | 2.27            | 0.66  | 0.004950516 |
| PWY0-1479                     | tRNA processing                                                                              | Intrasporangiaceae;<br>Pedobacter;<br>Xanthomonas;<br>Xanthomonadaceae;<br>Luteimonas                                                                                                                   | Field_Barley    | Steeped | Depleted           | 122.95   | -2.84           | 0.95  | 0.013346605 |
| HCAMHPDEG-PWY                 | 3-phenylpropanoate and 3-(3-hydroxyphenyl)propanoate degradation to 2-oxopent-4-enoate       | Micrococcaceae;<br>Microbacterium;<br>Arthrobacter;<br>Corynebacterium;<br>Actinomycetales                                                                                                              | Steeped         | Kilned  | Enriched           | 224.87   | 2.65            | 0.49  | 1.43E-06    |
| PWY-6690                      | cinnamate and 3-hydroxycinnamate degradation to 2-oxopent-4-enoate                           | Micrococcaceae;<br>Microbacterium;<br>Arthrobacter;<br>Corynebacterium;<br>Actinomycetales                                                                                                              | Steeped         | Kilned  | Enriched           | 224.87   | 2.65            | 0.49  | 1.43E-06    |

| Function            | description                                                        | genus                                                                                                                                                   | Reference stage | Stage  | Enriched/ Depleted | baseMean | log2Fold Change | lfcSE | padj        |
|---------------------|--------------------------------------------------------------------|---------------------------------------------------------------------------------------------------------------------------------------------------------|-----------------|--------|--------------------|----------|-----------------|-------|-------------|
| PWY0-1277           | 3-phenylpropanoate and 3-(3-hydroxyphenyl)propanoate degradation   | Lactococcus; Micrococcaceae; Leuconostoc; Microbacterium; Arthrobacter; Actinomycetales; Streptococcus; Leuconostocaceae; Sanguibacter; Corynebacterium | Steeped         | Kilned | Enriched           | 490.33   | 2.21            | 0.42  | 2.61E-06    |
| NAD-BIOSYNTHESIS-II | NAD salvage pathway II                                             | Intrasporangiaceae; Pedobacter; Xanthomonas; Xanthomonadaceae; Luteimonas                                                                               | Steeped         | Kilned | Depleted           | 397.99   | -2.13           | 0.85  | 0.029022103 |
| NADSYN-PWY          | NAD biosynthesis II (from tryptophan)                              | Intrasporangiaceae; Pedobacter; Xanthomonas; Xanthomonadaceae; Luteimonas                                                                               | Steeped         | Kilned | Depleted           | 587.75   | -2.23           | 0.55  | 0.000599512 |
| PWY-5651            | L-tryptophan degradation to 2-amino-3-carboxymuconate semialdehyde | Intrasporangiaceae; Pedobacter; Xanthomonas; Xanthomonadaceae; Luteimonas                                                                               | Steeped         | Kilned | Depleted           | 456.17   | -2.38           | 0.57  | 0.000430854 |
| TYRFUMCAT-PWY       | L-tyrosine degradation I                                           | Intrasporangiaceae; Pedobacter; Xanthomonas; Xanthomonadaceae; Luteimonas                                                                               | Steeped         | Kilned | Depleted           | 452.27   | -2.46           | 0.69  | 0.002307863 |
| PPGPPMET-PWY        | ppGpp biosynthesis                                                 | Intrasporangiaceae; Pedobacter; Xanthomonas; Xanthomonadaceae; Luteimonas                                                                               | Steeped         | Kilned | Depleted           | 706.97   | -2.57           | 0.74  | 0.002919526 |
| PWY-5028            | L-histidine degradation II                                         | Intrasporangiaceae; Pedobacter; Xanthomonas; Xanthomonadaceae; Luteimonas                                                                               | Steeped         | Kilned | Depleted           | 330.26   | -3.17           | 0.53  | 9.75E-08    |

**Supplementary Table S4: Topological properties of molecular ecological networks of microbial communities associated with field and steeped barley grains and the malt end product.**

| <b>Network Indexes</b>                        | <b>Field barley</b>                     | <b>Steeped</b>                          | <b>Malt</b>                                    |
|-----------------------------------------------|-----------------------------------------|-----------------------------------------|------------------------------------------------|
| Nodes                                         | 380                                     | 537                                     | 307                                            |
| Edges                                         | 3820                                    | 6558                                    | 483                                            |
| Average degree                                | 10.75                                   | 14.92                                   | 1.99                                           |
| Average path distance                         | 2.48                                    | 2.43                                    | 2.41                                           |
| Average clustering coefficient                | 0.362                                   | 0.357                                   | 0.413                                          |
| Max degree                                    | 98                                      | 98                                      | 19                                             |
| Node with max degree                          | Micrococcaceae sp. (in Actinobacteria)  | Micrococcaceae sp. (in Actinobacteria)  | <i>Cryptococcus</i> sp. (in Basidiomycota)     |
| Max betweenness                               | 3663.45                                 | 3663.45                                 | 7851.11                                        |
| Node with max betweenness                     | Actinomycetales sp. (in Actinobacteria) | Actinomycetales sp. (in Actinobacteria) | <i>Corynebacterium</i> sp. (in Actinobacteria) |
| Max betweenness centrality                    | 1212.12                                 | 3394                                    | 2010.37                                        |
| Node with max betweenness centrality          | Actinomycetales sp. (in Actinobacteria) | Bacteria sp.                            | <i>Corynebacterium</i> sp. (in Actinobacteria) |
| Closeness centrality                          | 7                                       | 7                                       | 6                                              |
| Node with max eigenvector centrality          | Comamonadacea (in Proteobacteria)       | NA                                      | <i>Cryptococcus</i> sp. (in Basidiomycota)     |
| Centralization of eigenvector centrality (CE) | 0.039                                   | 0.048                                   | 0.047                                          |



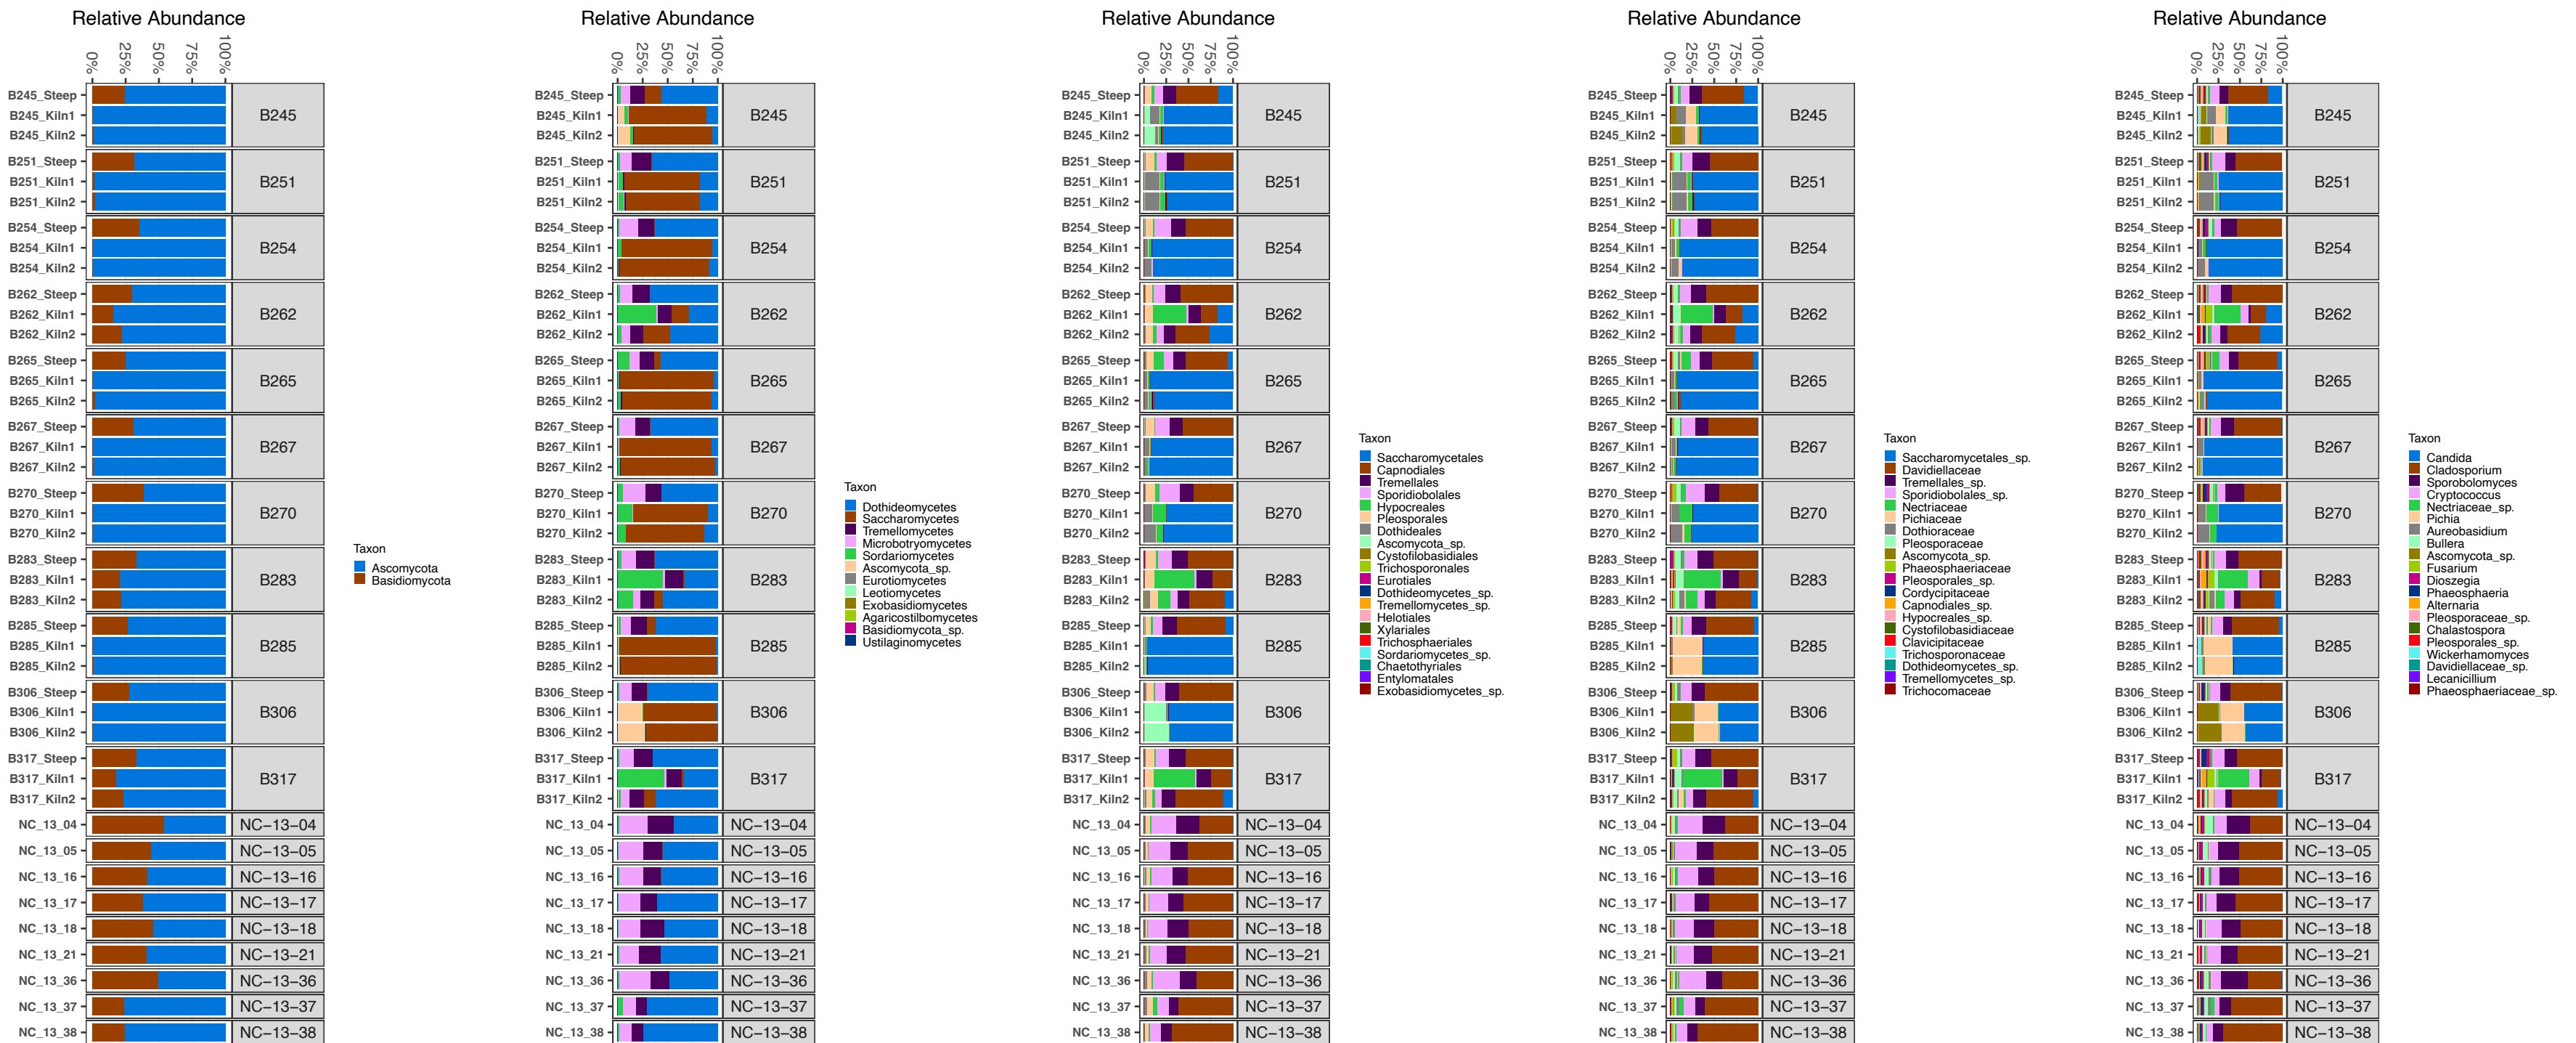

**Supplementary Figure S1. Fungal community taxonomic profile at the A) phylum, B) class, C) order, D) family, and E) genus levels.**

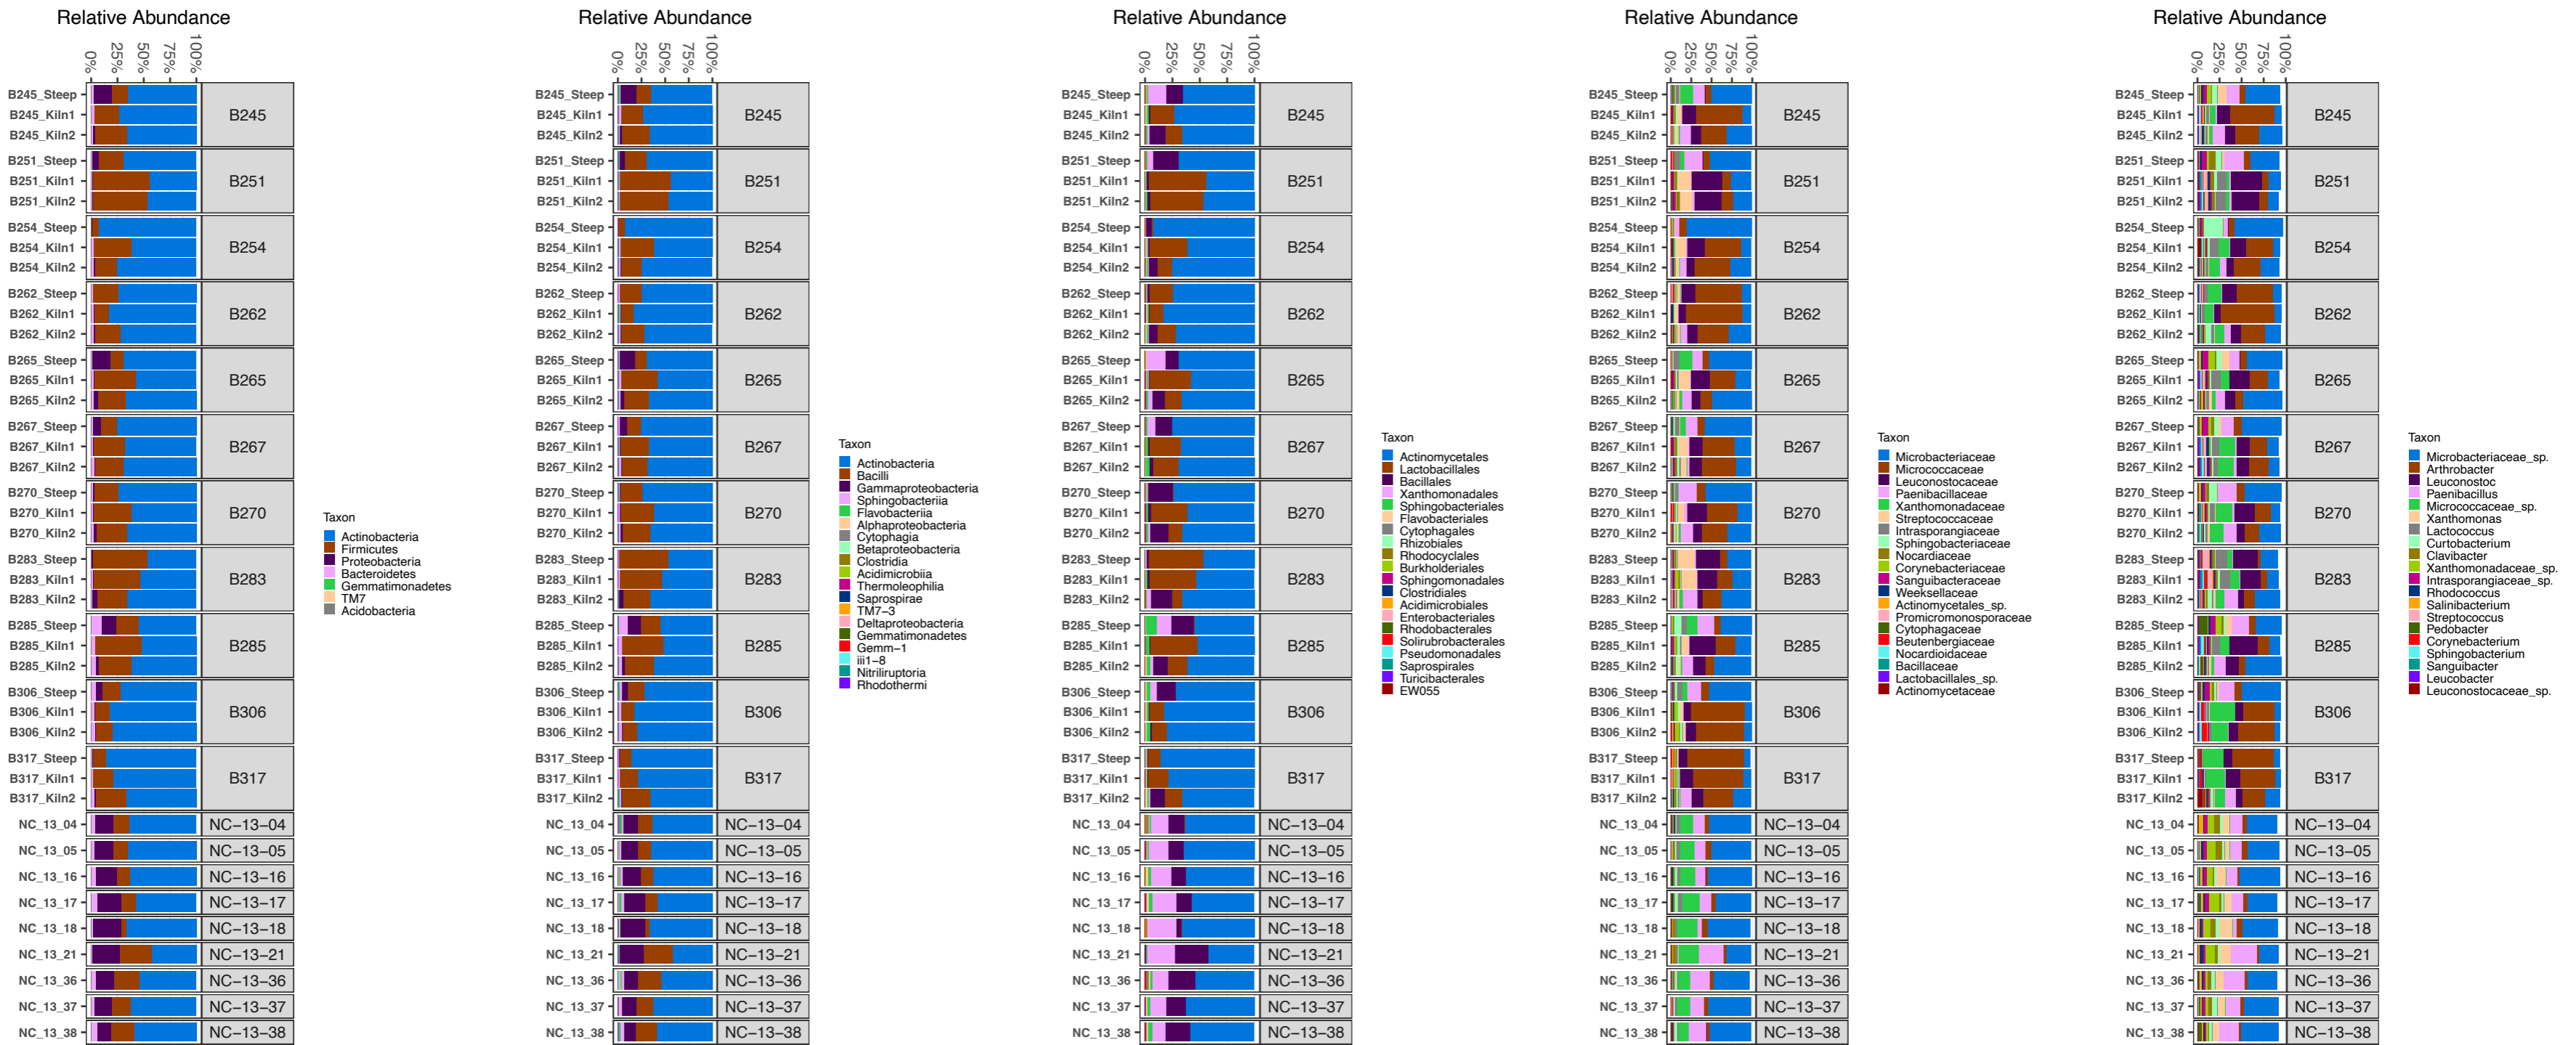

**Supplementary Figure S2. Bacterial community taxonomic profile at the A) phylum, B) class, C) order, D) family, and E) genus levels.**
